# Supplementary material
Source: PubMed Central journal article supplement (PMC5540229)
Supplement: NIHMS883869-supplement-Supplement.pdf [file NIHMS883869-supplement-Supplement.pdf]

## Supplementary Information

### The ClusPro web server for protein-protein docking

Dima Kozakov, David R. Hall, Bing Xia, Kathryn A. Porter, Dzmitry Padhorny,  
Christine Yueh, Dmitri Beglov, Sandor Vajda

**TABLE S1** | Performance of ClusPro on Docking Benchmark 4.0<sup>1</sup>

| <b>Enzyme-Inhibitor pairs</b>                                |                               |                                           |                   |                                             |                   |
|--------------------------------------------------------------|-------------------------------|-------------------------------------------|-------------------|---------------------------------------------|-------------------|
| <b>Easy (40/41)<sup>a</sup></b>                              |                               | <b>Medium (3/6)<sup>a</sup></b>           |                   | <b>Difficult (1/5)<sup>a</sup></b>          |                   |
| <b>No. &lt;10 Å<sup>b</sup></b>                              | <b>Min. IRMSD<sup>c</sup></b> | <b>No. &lt;10 Å</b>                       | <b>Min. IRMSD</b> | <b>No. &lt;10 Å</b>                         | <b>Min. IRMSD</b> |
| 172.3                                                        | 2.94                          | 42.5                                      | 8.21              | 19.0                                        | 15.9              |
| <b>Other type complexes</b>                                  |                               |                                           |                   |                                             |                   |
| <b>Easy (28/59)<sup>a</sup></b>                              |                               | <b>Medium (10/22)<sup>a</sup></b>         |                   | <b>Difficult (6/18)<sup>a</sup></b>         |                   |
| <b>No. &lt;10 Å</b>                                          | <b>Min. IRMSD</b>             | <b>No. &lt;10 Å</b>                       | <b>Min. IRMSD</b> | <b>No. &lt;10 Å</b>                         | <b>Min. IRMSD</b> |
| 78.8                                                         | 7.54                          | 59.9                                      | 7.09              | 49.8                                        | 10.48             |
| <b>Antibody-antigen pairs (unbound structure of antigen)</b> |                               |                                           |                   |                                             |                   |
| <b>Unbound antibody (7/11)<sup>a</sup></b>                   |                               | <b>Bound antibody (10/11)<sup>a</sup></b> |                   | <b>Unbound Ab + mask (8/11)<sup>a</sup></b> |                   |
| <b>No. &lt;10 Å</b>                                          | <b>Min. IRMSD</b>             | <b>No. &lt;10 Å</b>                       | <b>Min. IRMSD</b> | <b>No. &lt;10 Å</b>                         | <b>Min. IRMSD</b> |
| 66.5                                                         | 5.0                           | 88.5                                      | 1.55              | 84.0                                        | 3.53              |

<sup>a</sup> Number of complexes that have clusters with < 10 Å IRMSD / Total number of complexes in the given category of the benchmark

<sup>b</sup> Average number of near-native docked structures with < 10 Å IRMSD among the 1000 lowest energy structures

<sup>c</sup> Average value of the lowest IRMSD

1 Hwang, H., Vreven, T., Janin, J. & Weng, Z. Protein-protein docking benchmark version 4.0. *Proteins* **78**, 3111-3114 (2010).
